# Supplementary material for: The seasonal development dynamics of the yak hair cycle transcriptome
Source: PubMed Central journal article supplement (PMC7216598; doi:10.1186/s12864-020-6725-7), 2020-05-11

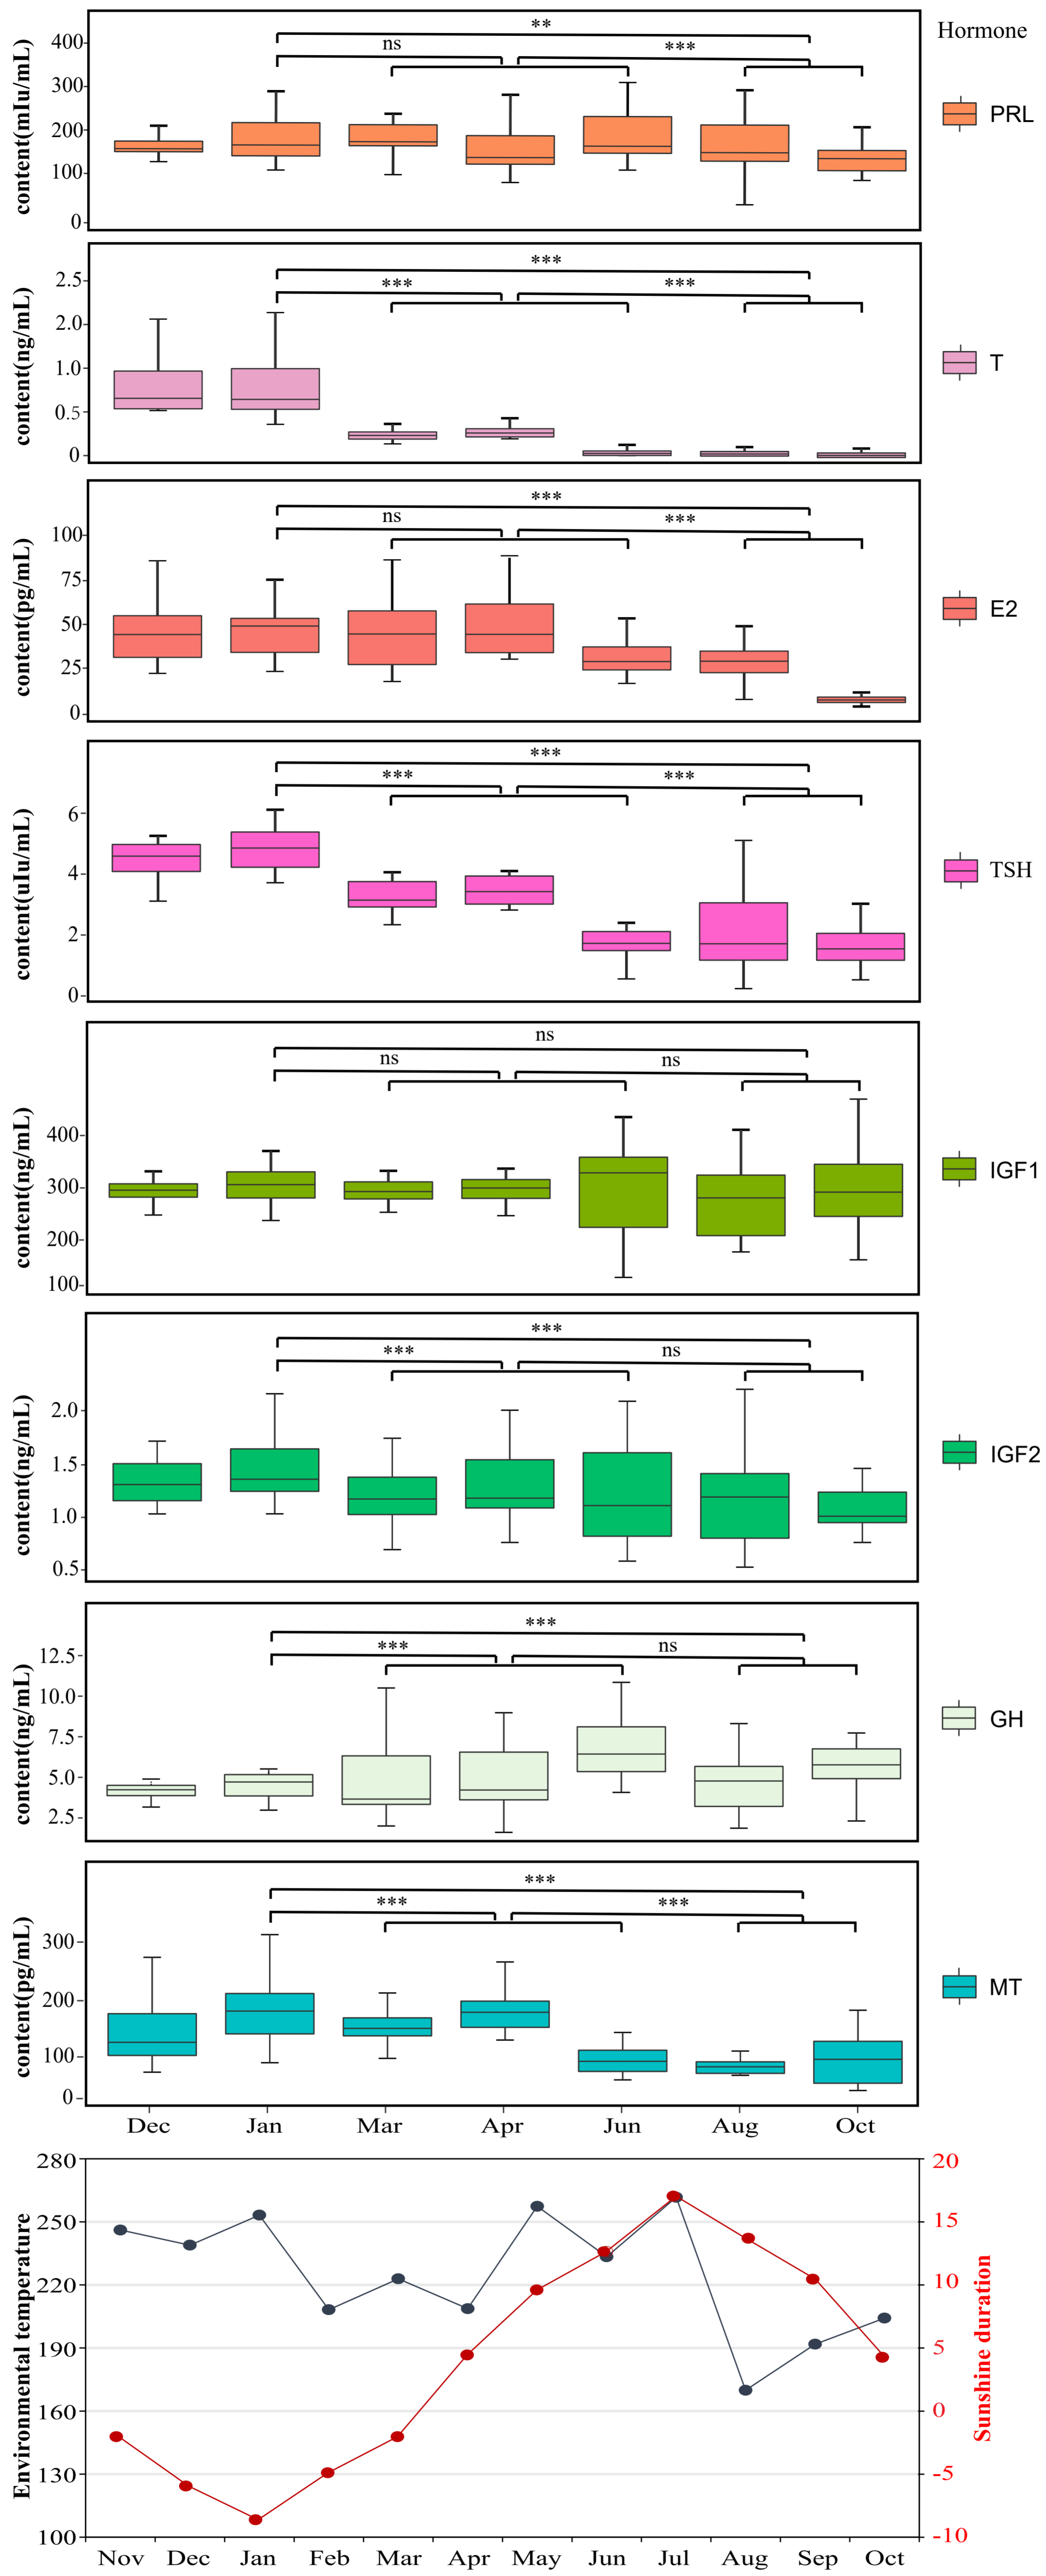

Supplement: 12864_2020_6725_MOESM6_ESM.pdf [file 12864_2020_6725_MOESM6_ESM.pdf]
